# Supplementary material for: Neoadjuvant nano-photothermal therapy used before operation effectively assists in surgery for breast cancer
Source: Royal Society of Chemistry journal article supplement (doi:10.1039/c8nr08109c), 2018-11-30
Supplement: c8nr08109c1.pdf [file c8nr08109c1.pdf]

*Supporting Information*

Neoadjuvant Nano-photothermal Therapy Used Before Operation  
Effectively Assists Surgery for Breast Cancer

Hao Yan,<sup>†a,b</sup> Wenting Shang,<sup>‡c</sup> Xiaodan Sun,<sup>a</sup> Lingyun Zhao,<sup>a</sup> Xiumei Wang,<sup>a</sup> Shuixing Zhang,<sup>c</sup> Nan Xu,<sup>a</sup> Wanhai Xu,<sup>\*d</sup> Jie Tian,<sup>\*c</sup> Feiyu Kang,<sup>\*a,b</sup>

<sup>a</sup> State Key Laboratory of New Ceramics and Fine Processing, School of Materials Science and Engineering, Tsinghua University, Beijing 100084, China

<sup>b</sup> Engineering Laboratory for Functionalized Carbon Materials, Graduate School at Shenzhen, Tsinghua University, Shenzhen 518055, China

<sup>c</sup> Key Laboratory of Molecular Imaging, Institute of Automation, Chinese Academy of Sciences, Beijing 100190, China

<sup>d</sup> Urology Surgery Department, The Fourth Hospital of Harbin Medical University, Harbin, Heilongjiang, 150001, P. R. China

<sup>e</sup> Department of Radiology, the First Affiliated Hospital, Jinan University, Guangzhou, Guangdong, P.R. China

<sup>†</sup>Electronic supplementary information (ESI) available: Experimental details and supporting results.  
See DOI: XXX

<sup>‡</sup>These authors contributed equally to this work.

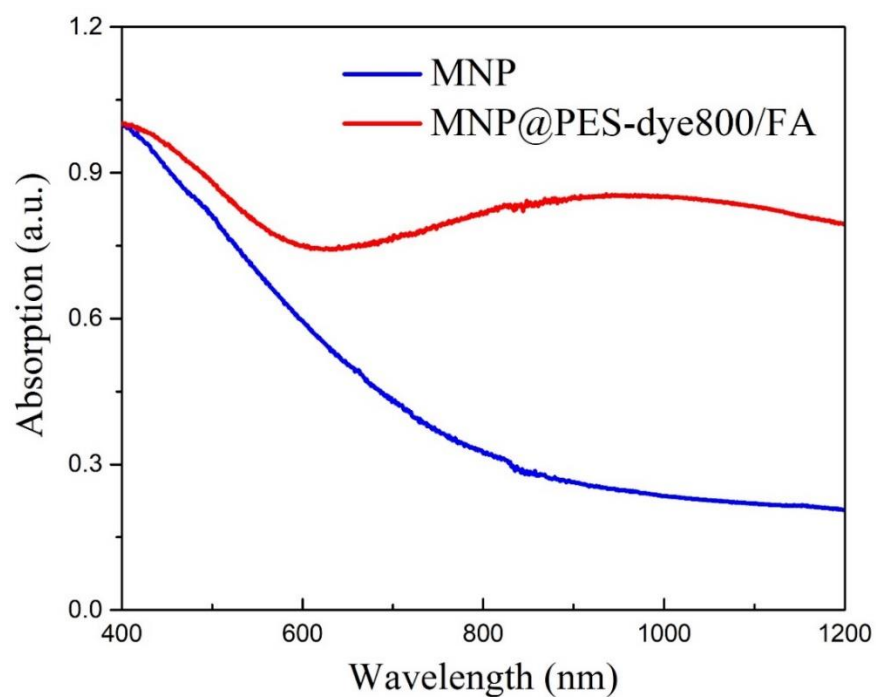

**Fig. S1** UV-Vis-NIR spectrum of two nanoparticles.

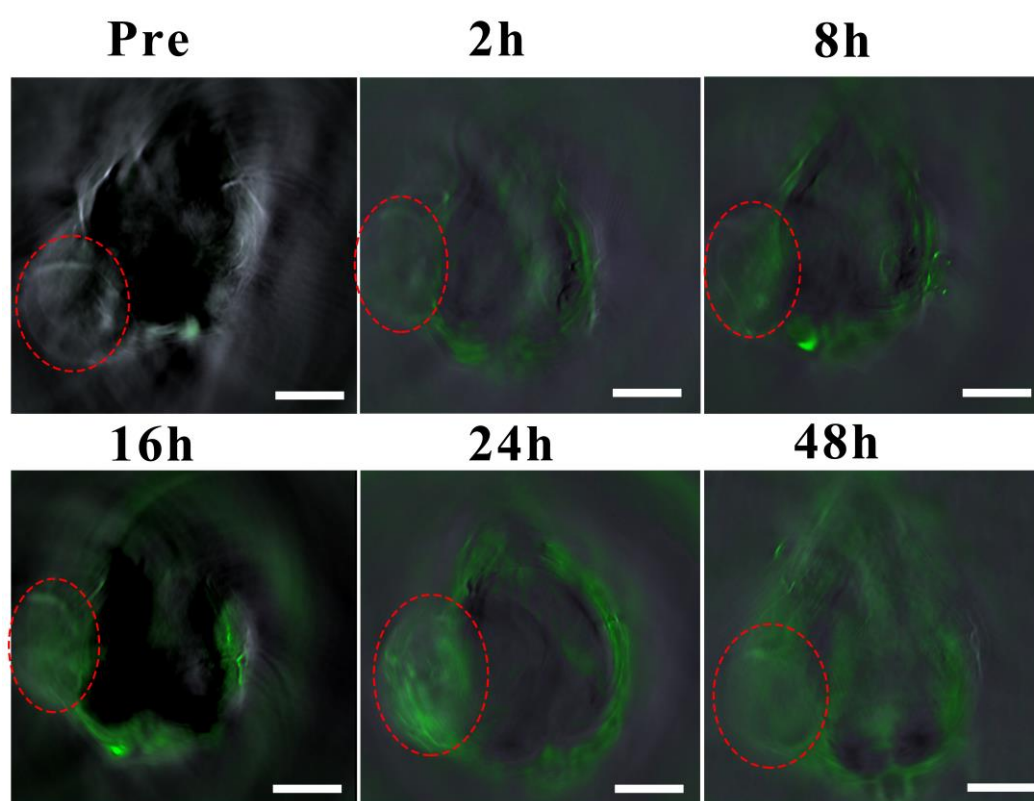

**Fig. S2** PA 2D images of the NPs-injected mice. The bright part is the blood vessels in the tumor site owing to hemoglobin. The green area (down) corresponds to the distribution of nanoprobe, the scale bar is 5 mm.

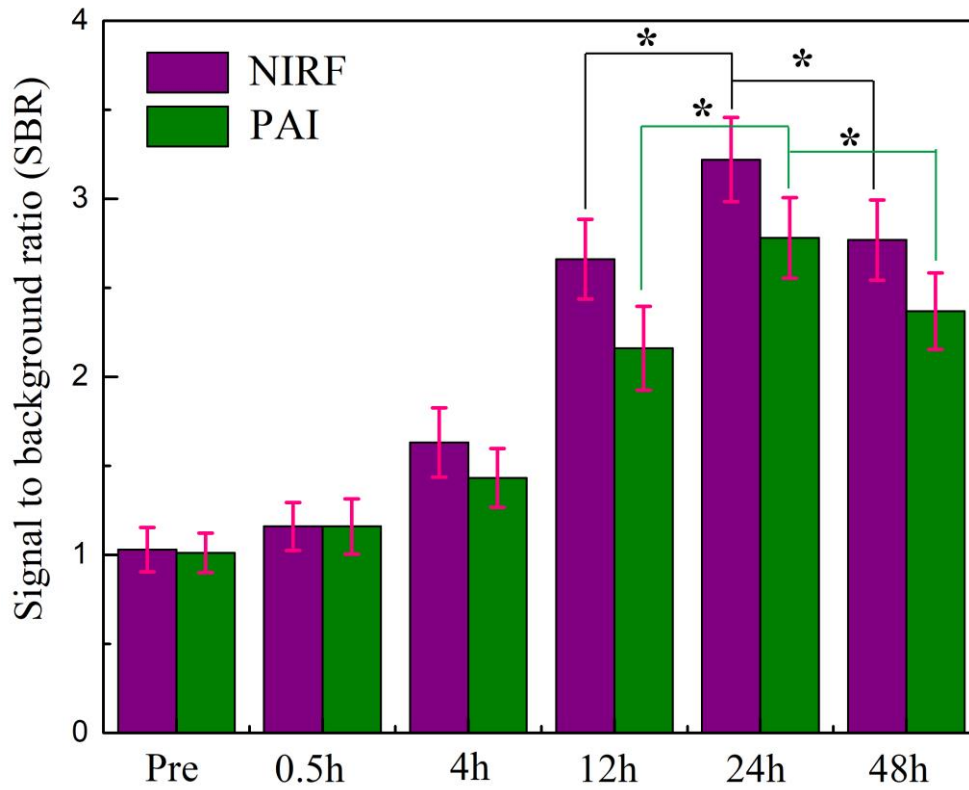

**Fig. S3** Signal to background ratio (SBR) analysis of fluorescence intensity and PAI intensity at different time points. Data were presented as mean value  $\pm$  SD ( $n = 4$ ); \* $p < 0.05$ .

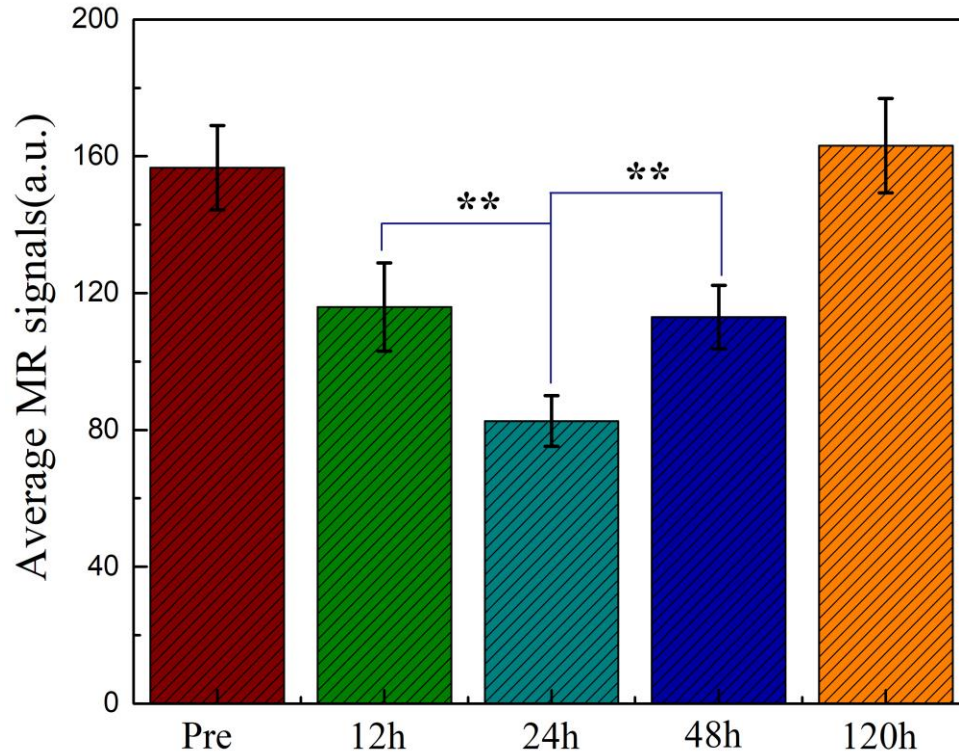

**Fig. S4** MRI intensity at different time points after injection. Data were presented as mean value  $\pm$  SD ( $n = 4$ ); \*\* $p < 0.01$ .

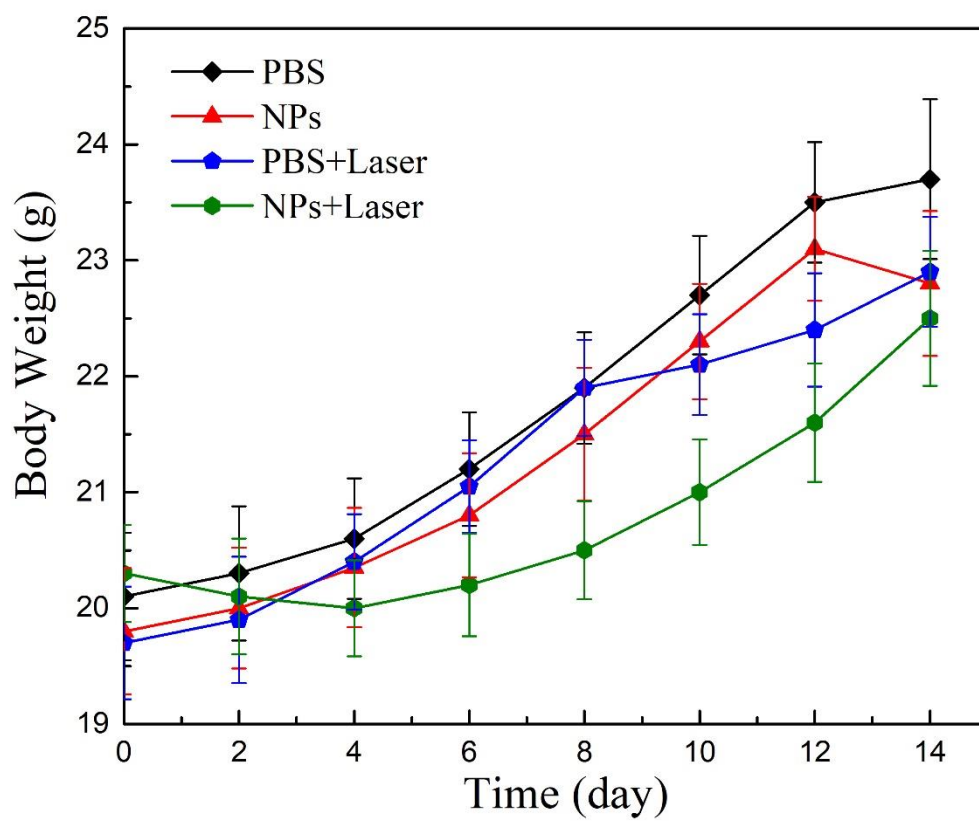

**Fig. S5** Body weights of mice in different groups after various treatments.



Before NPTT

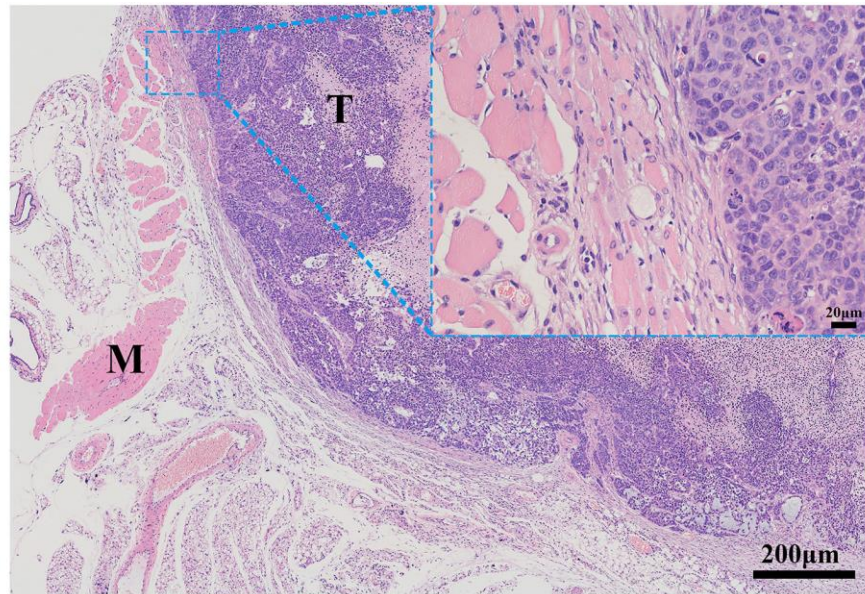

After NPTT

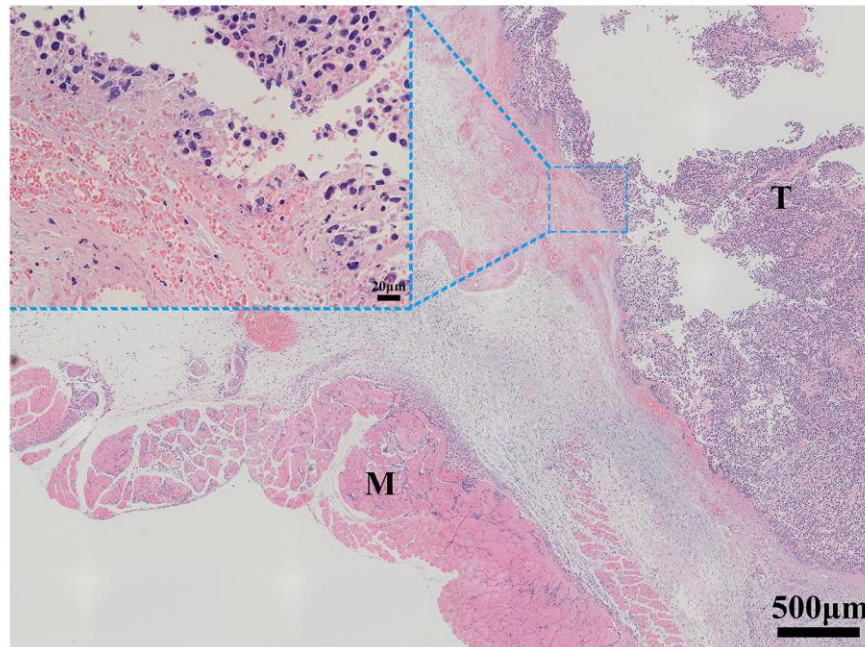

**Fig. S6** H&E-stained images of tumor before NPTT and after NPTT. Before NPTT, a local magnification view inserted at the upper right corner, tumor cells largely invade into normal tissue that makes surgery difficult. After NPTT, a local magnification view inserted at the upper left corner, tumor cells that once invaded into normal tissue became round, atrophic and apoptosis, and the boundaries between tumor and normal tissue become clearer.



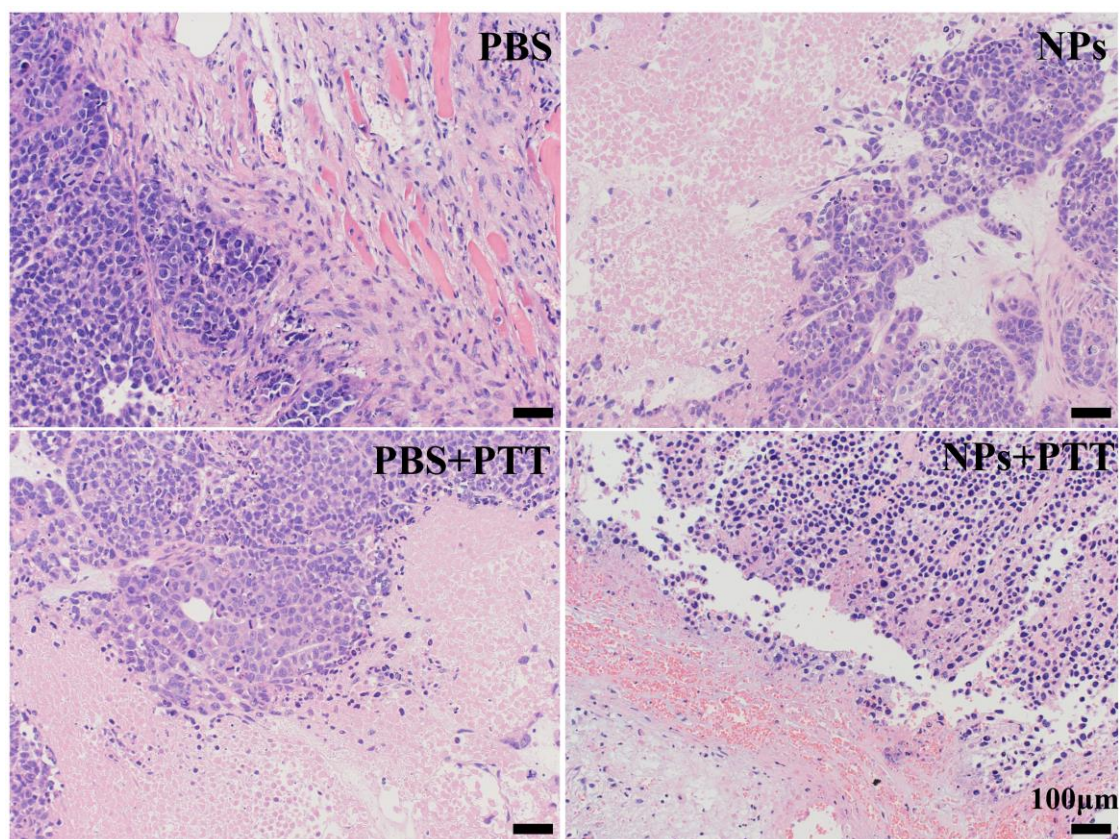

**Fig. S7** H&E-stained images of tumors collected from four different groups, the boundary between tumor and normal tissue was much clearer, bars represent 100  $\mu\text{m}$ .

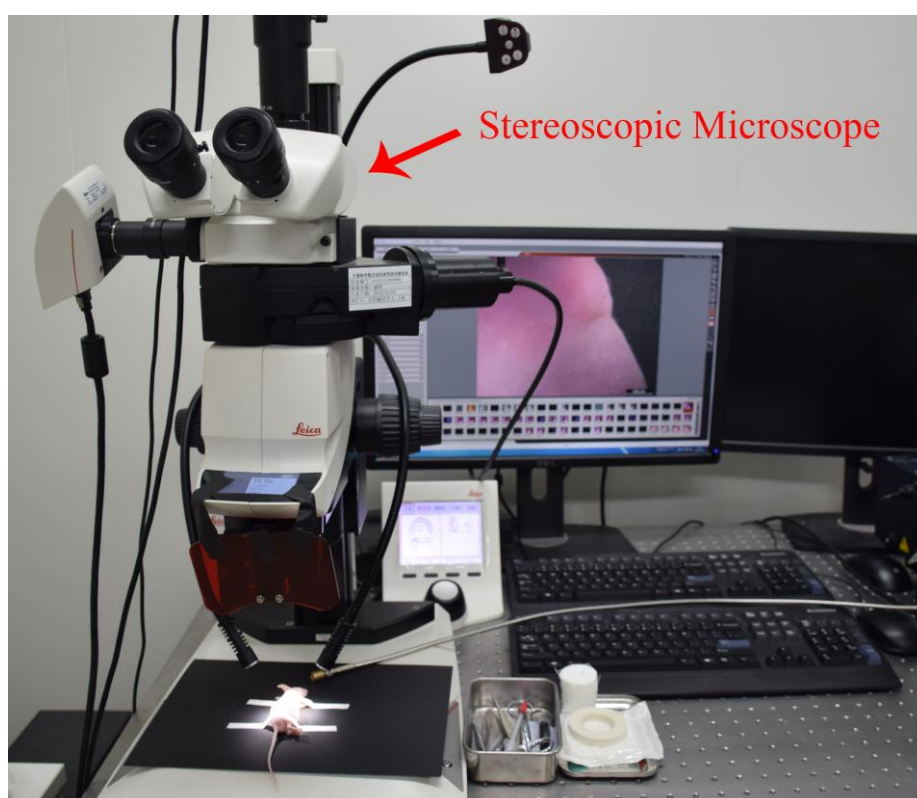

**Fig. S8** Operation picture of surgical resection of tumor by stereoscopic microscope.
